# Supplementary material for: Serum proteomics links suppression of tumor immunity to ancestry and lethal prostate cancer
Source: PubMed Central journal article supplement (PMC8975871; doi:10.1038/s41467-022-29235-2), 2022-04-01
Supplement: 41467_2022_29235_MOESM1_ESM.pdf [file 41467_2022_29235_MOESM1_ESM.pdf]

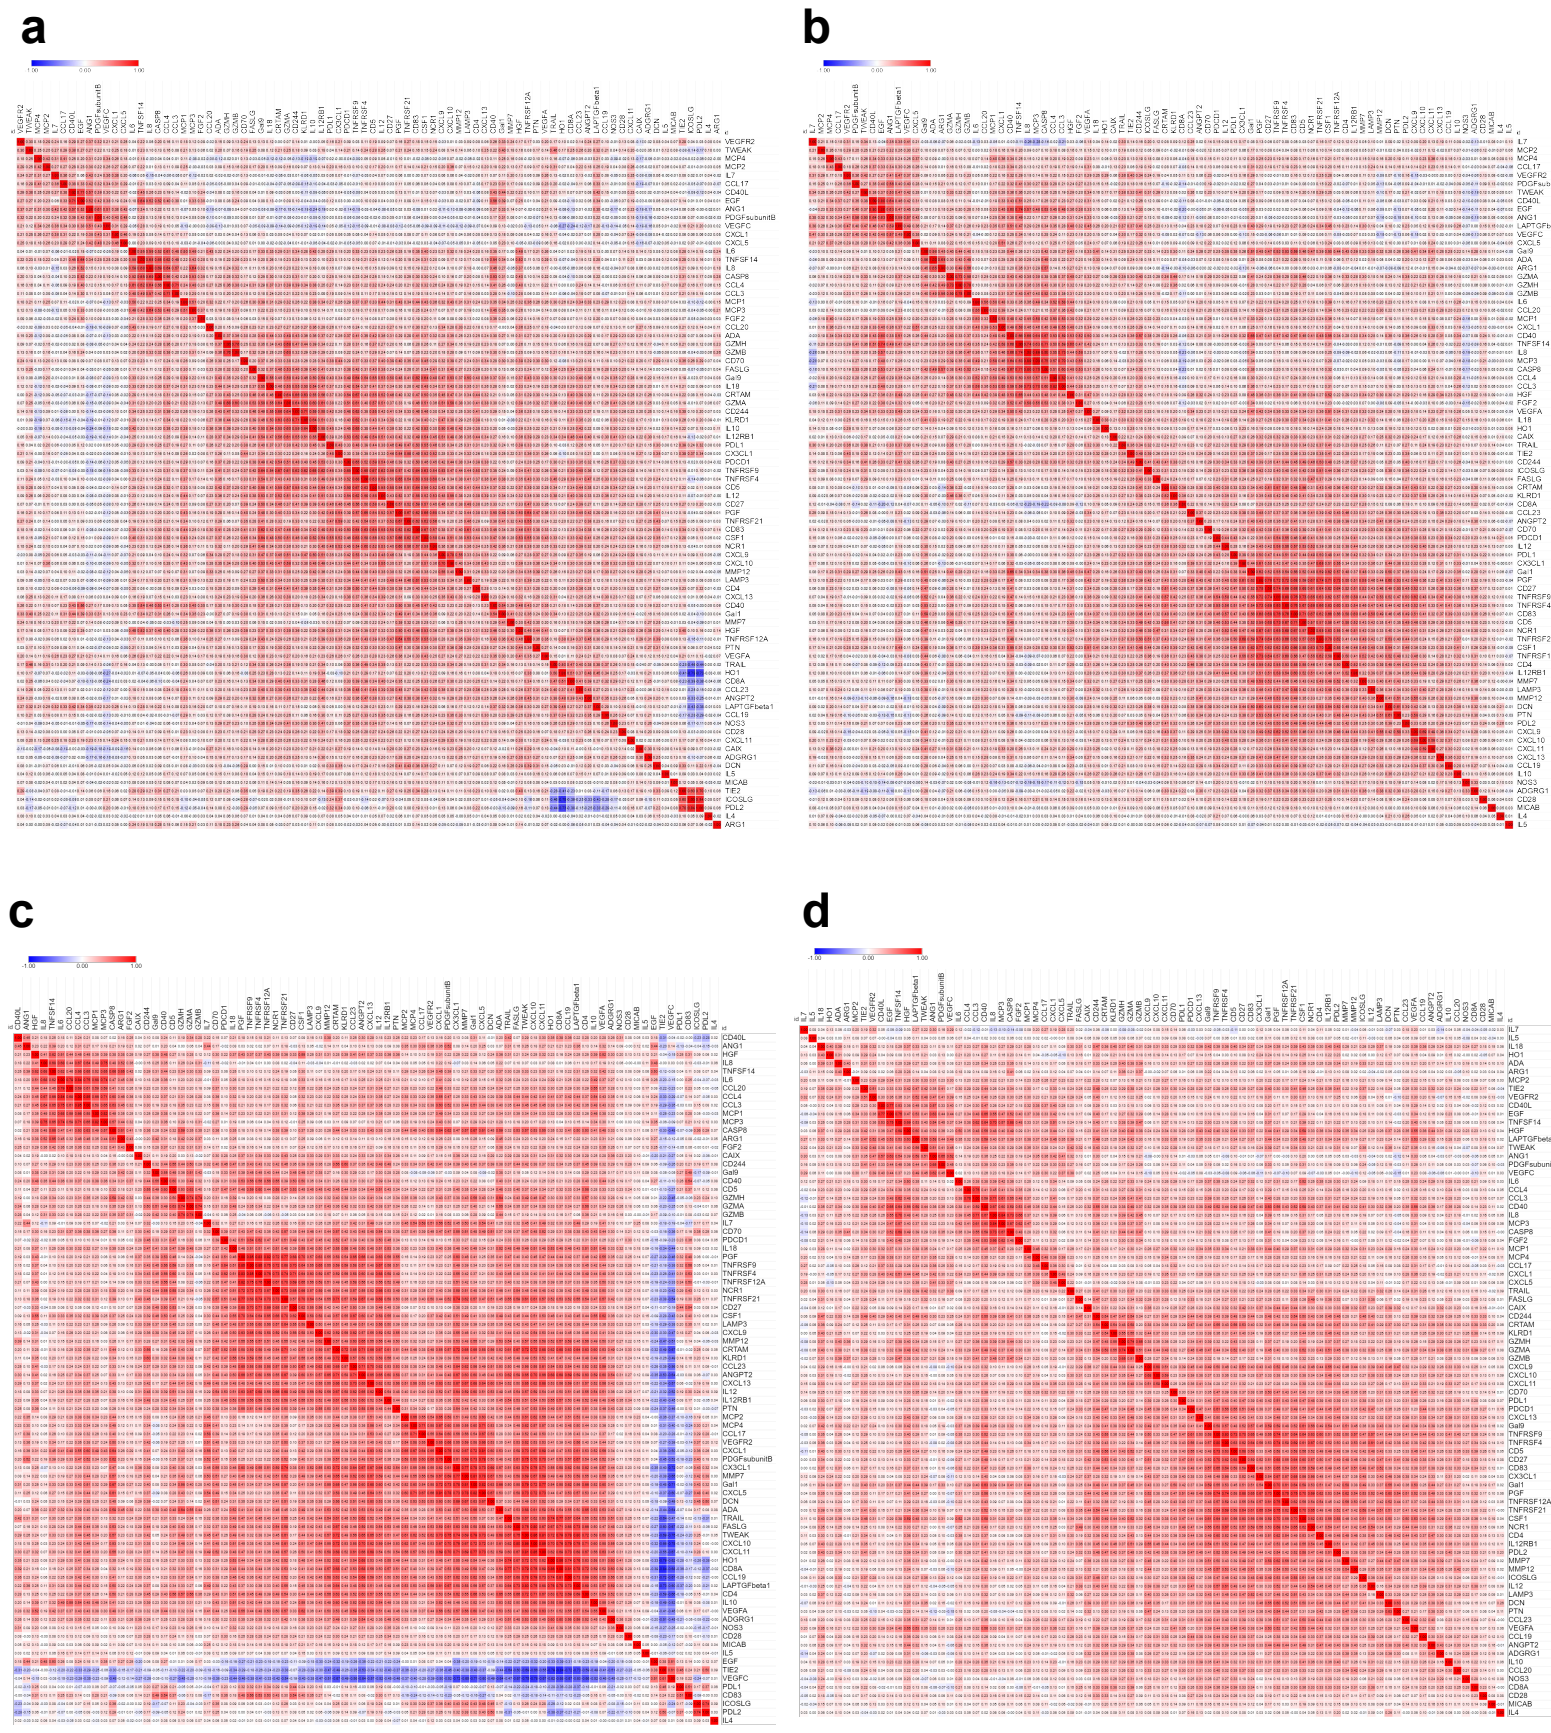

**Supplementary Fig. 3 Correlation matrix presenting Pearson pairwise correlations for each of the 82 serum protein pairs.** Pearson pairwise correlations were estimated for each serum protein pairs in (a) Ghanaian (n=654) and (b) EA (n=454) population controls and (c) Ghanaian (n=489) and (d) EA (n=425) prostate cancer cases. Source data are provided as a Source Data file.

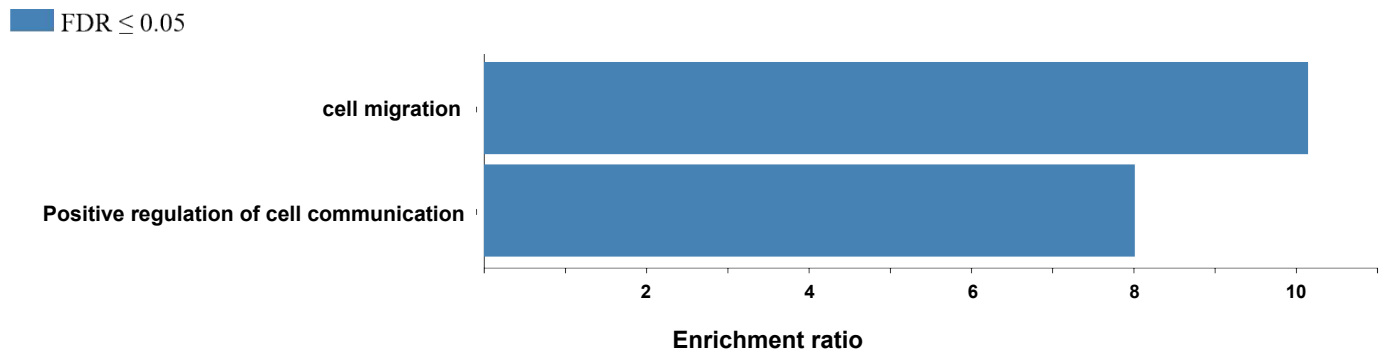

**Supplementary Fig. 4. Gene ontology (GO) enrichment analysis.** Over-Representation Analysis (ORA) was performed to identify the biological functions over-represented by the serum proteins that were positively associated with aging in all three population cohorts (Ghanaian, AA, and EA). Source data are provided as a Source Data file.



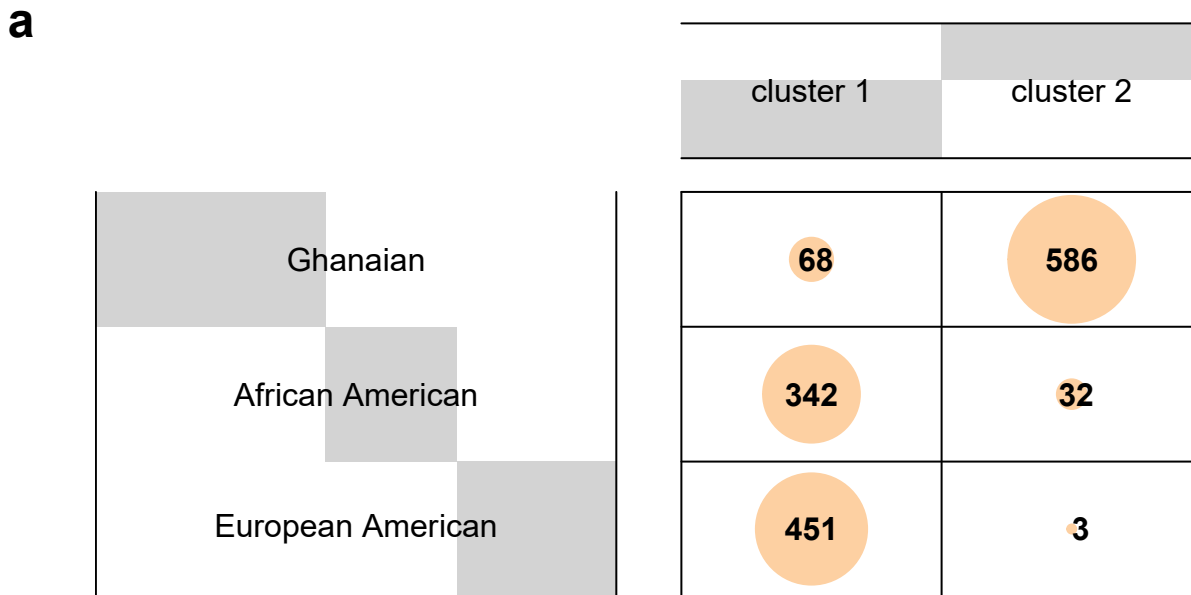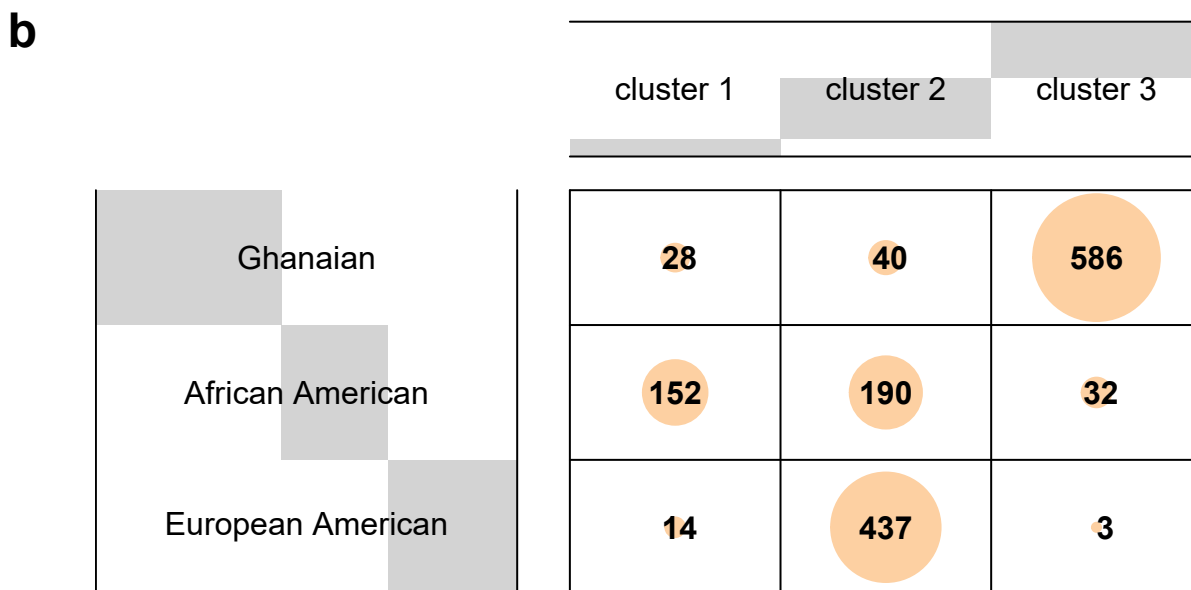

**Supplementary Fig. 5. Clusters based on 82-protein profiles are enriched by population group (654 Ghanaian, 374 AA, and 454 EA).** The dendrogram obtained from hierarchical clustering was cut to extract K clusters, yielding the contingency tables of cluster assignments vs. population groups shown for (a) K=2 and (b) K=3. For K=2, cluster 1 contains most EA and AA men, while cluster 2 contains most Ghanaian men. For K=3, EA are mostly grouped in cluster 2, AA are chiefly shared between clusters 1 and 2, while most Ghanaian men are in cluster 3. Cluster enrichment by population group was confirmed by Fisher's and chi-squared tests (two-sided  $p < 1.e-10$ ). Source data are provided as a Source Data file.

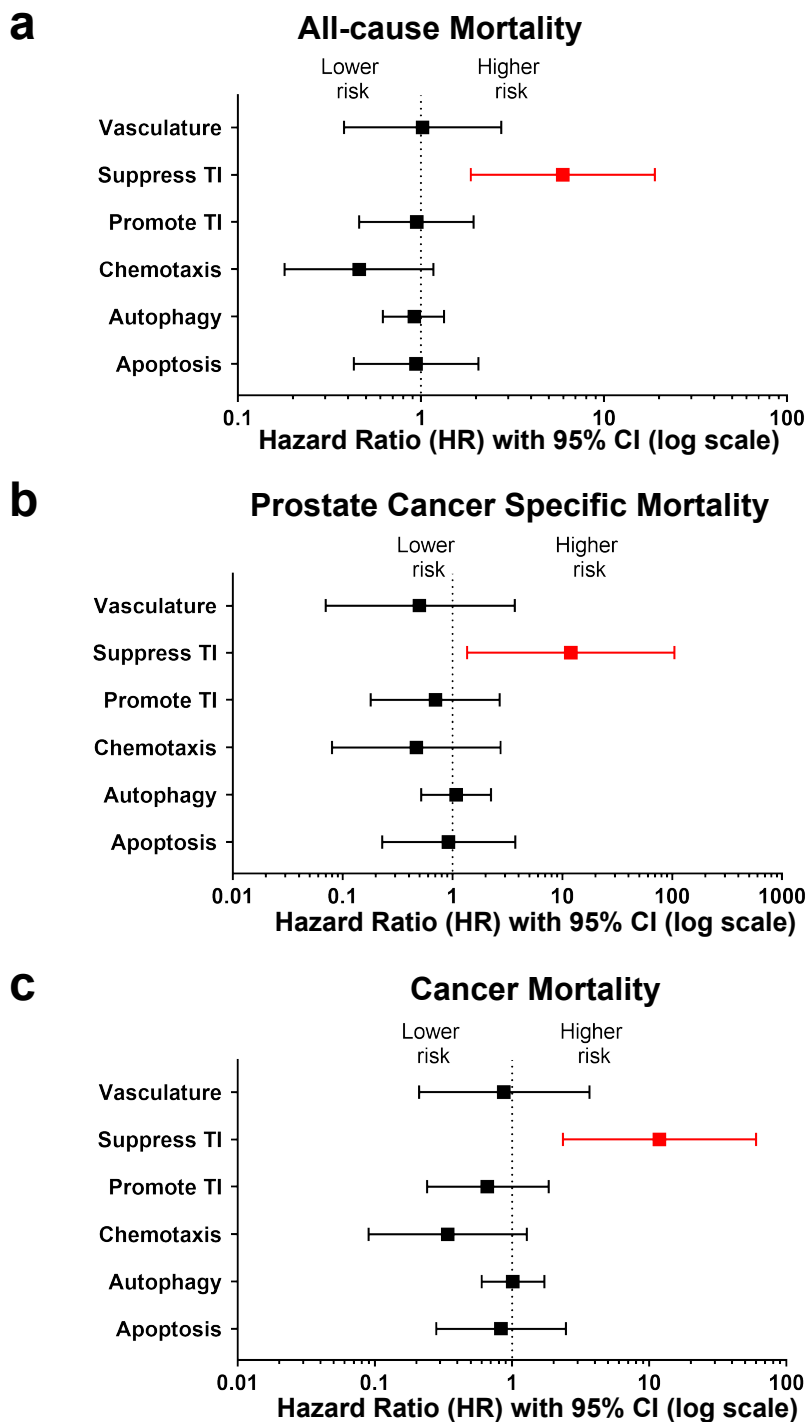

**Supplementary Fig. 6. Suppression of the tumor immunity pathway associates with survival of prostate cancer patients.** We assessed the association of the six pathways defined by the 82 immunology markers with all-cause mortality (n=202), prostate cancer-specific mortality (n=57), or mortality due to any cancer after a prostate cancer diagnosis (n=103) out of the 819 prostate cancer patients followed. The pathway scores were evaluated as continuous predictor variables. Suppression of tumor immunity pathway was distinctively associated with all-cause mortality (a), prostate cancer-specific mortality (b), or mortality due to any cancer after a prostate cancer diagnosis (c). Multivariable Cox regression analyses were used to assess if the pathways were independently associated with survival of prostate cancer patients in the NCI-Maryland study. For (a-c), the hazard ratios (HRs) were adjusted for age at study entry (years), body-mass index (BMI, kg/m<sup>2</sup>), self-reported race (AA/EA), education (high school or less, some college, college, professional school), income (less than \$10k, \$10-30K, \$30-60K, \$60-90k, greater than \$90k), smoking history (never, former, current), diabetes (no/yes), aspirin use (no/yes), treatment (0=none, 1=surgery, 2=radiotherapy, 3=hormone, 4=combination), and NCCN risk score. The HRs indicate the change in risk of dying when the biological process z-score value increases by 1 while holding all the other biological processes' z-scores and covariates constant. Data are presented as hazard ratios +/- 95% Confidence Intervals (CI). Source data are provided as a Source Data file. TI= tumor immunity.

**a**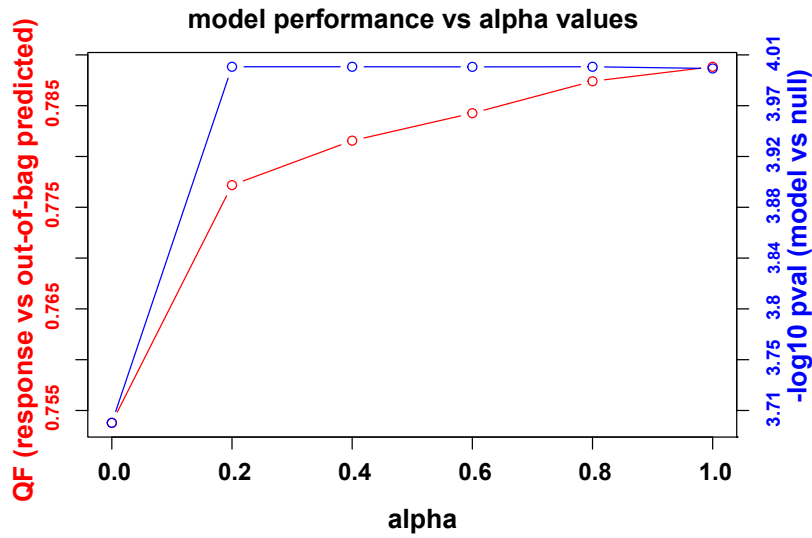**b**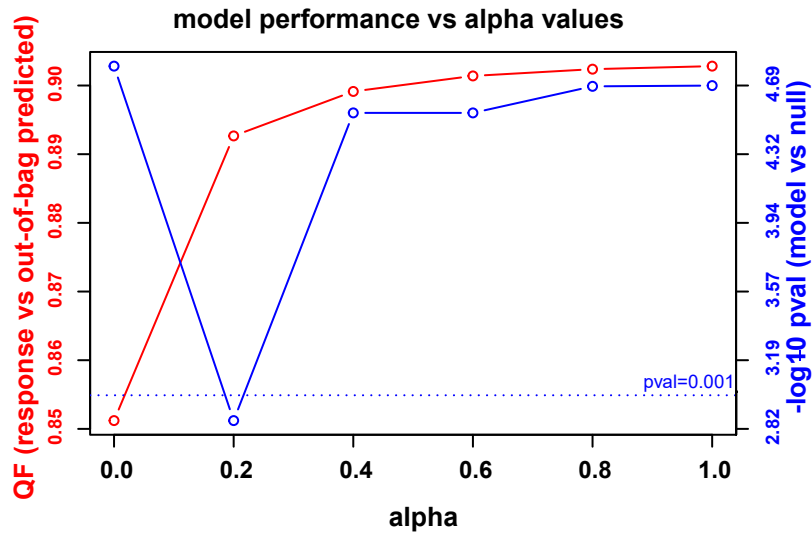

**Supplementary Fig. 7. Performance of regularized Cox regression models across alpha.** Cross-validated, regularized Cox regression models with different elastic net mixture parameter from ridge ( $\alpha=0$ ) to lasso ( $\alpha=1$ ) were implemented to identify a predictive proteomic signature of lethal prostate cancer for AA patients **(a)** without and **(b)** with NCCN risk score. Performance across alpha is shown with the 5-fold cross-validated quality function (QF) or concordance (red) and statistical significance (empirical one-sided p-value of model vs null) (blue). Lasso regression model ( $\alpha=1$ ) had the best out-of-bag performance. Source data are provided as a Source Data file.



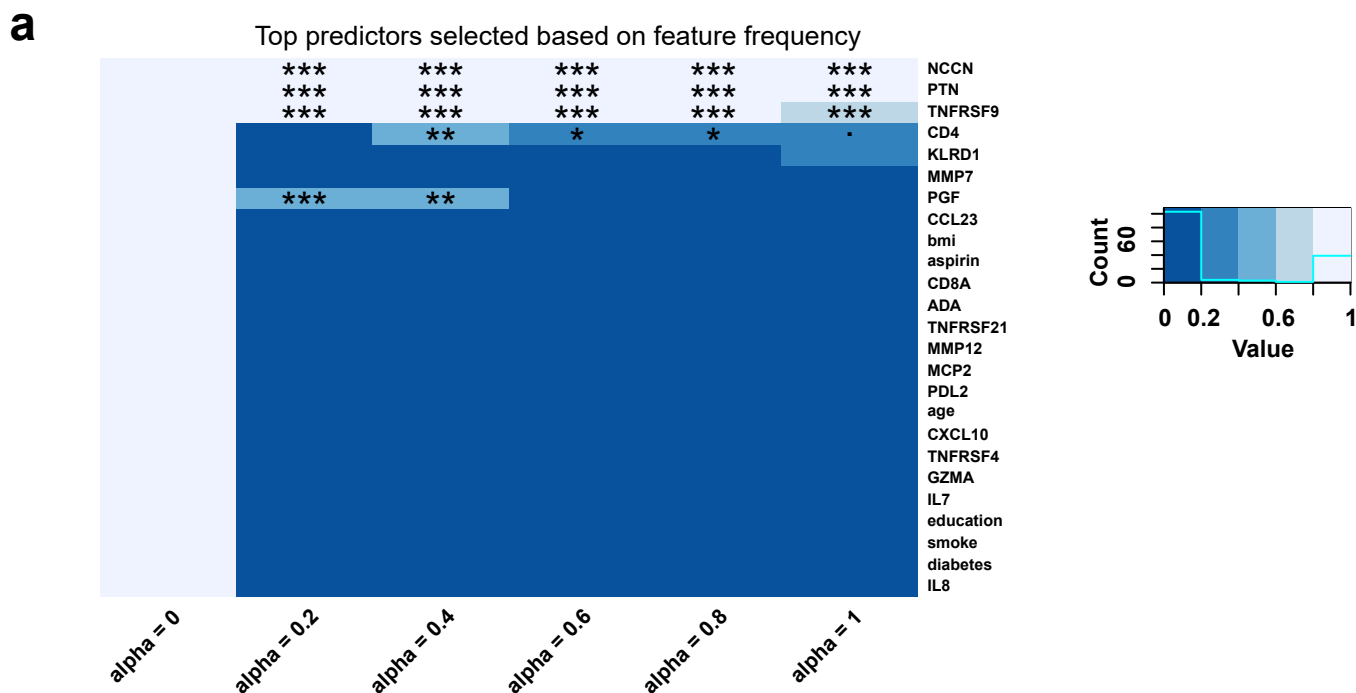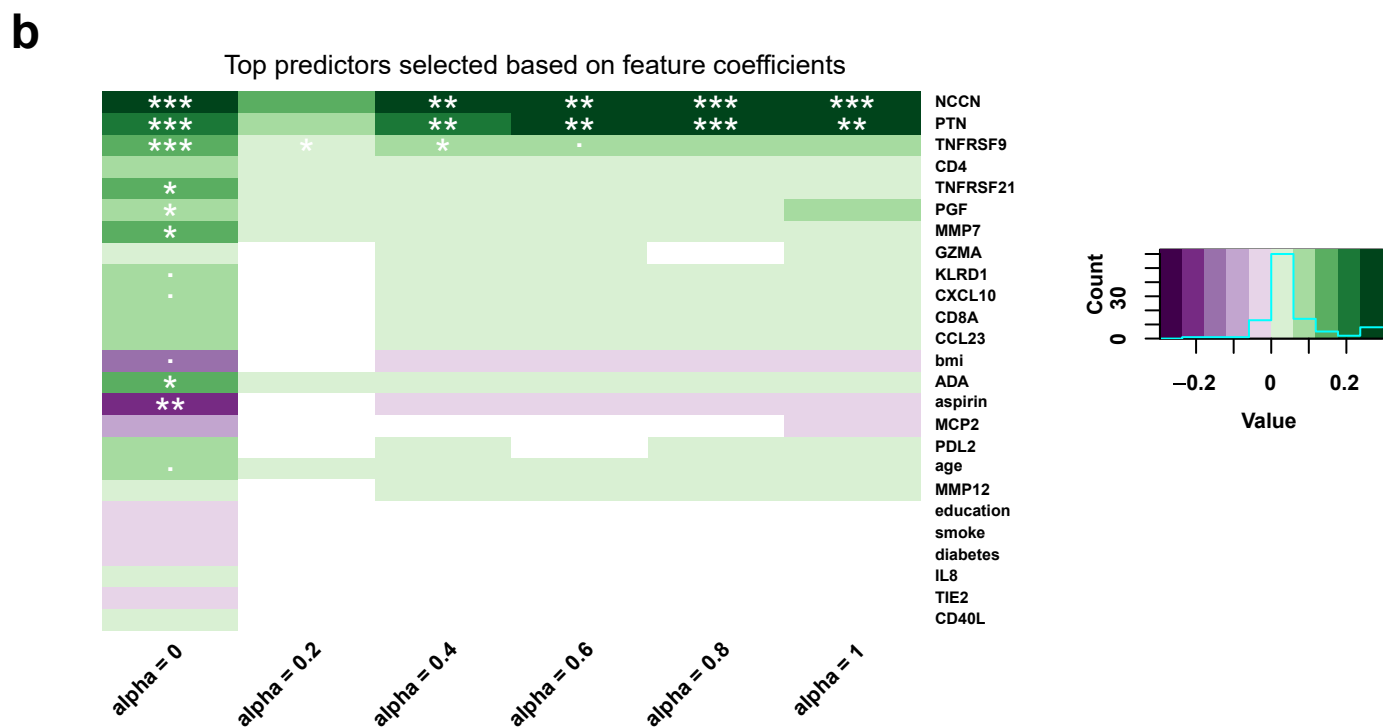

**Supplementary Fig. 8. NCCN and analytes pleiotrophin (PTN) and TNFRSF9/CD137/4-1BB are the most predictive features for lethal prostate cancer in AA patients.** Cross-validated, regularized Cox regression models with different elastic net mixture parameters from ridge ( $\alpha=0$ ) to lasso ( $\alpha=1$ ) were implemented to identify a predictive proteomic signature. One-sided  $P$  values were obtained empirically by comparing feature frequencies and coefficients against those obtained from random permutations of the response. **(a)** Heatmaps of feature frequencies across  $\alpha$ . Features were ranked by  $P$  value for  $\alpha=1$ . **(b)** Heatmaps of feature coefficients across  $\alpha$ . Features were ranked by  $P$  value for  $\alpha=1$ .  $P$  value significance was coded as  $<0.001$  (\*\*\*),  $<0.01$  (\*\*),  $<0.05$  (\*), and  $<0.1$  (.). The exact  $P$  values are found in the Source Data file. Source data are provided as a Source Data file.

**Supplementary Table 1.** Characteristics of prostate cancer cases and population controls of the NCI-Maryland and NCI-Ghana Studies

| Demographics                          | Controls            |                            |                            | Cases               |               |               |
|---------------------------------------|---------------------|----------------------------|----------------------------|---------------------|---------------|---------------|
|                                       | Ghanaian<br>(n=654) | AA <sup>a</sup><br>(n=374) | EA <sup>b</sup><br>(n=454) | Ghanaian<br>(n=489) | AA<br>(n=394) | EA<br>(n=425) |
| Age <sup>c</sup>                      |                     |                            |                            |                     |               |               |
| Median (IQR <sup>d</sup> ) in years   | 59 (11)             | 64 (10)                    | 66.5 (13)                  | 70 (11)             | 63 (11)       | 65 (11)       |
| BMI                                   |                     |                            |                            |                     |               |               |
| Mean(SD <sup>e</sup> ) in kg/m2       | 24.3 (4.4)          | 29.6 (5.4)                 | 27.8 (4.7)                 | 25.6 (5.1)          | 28.0 (5.2)    | 28.0 (4.3)    |
| Education for NCI-MD, N(%)            |                     |                            |                            |                     |               |               |
| High school or less                   | NA                  | 107 (29)                   | 83 (18)                    | NA                  | 183 (46)      | 110 (26)      |
| Some college                          | NA                  | 109 (29)                   | 93 (20)                    | NA                  | 130 (33)      | 110 (26)      |
| College                               | NA                  | 84 (22)                    | 136 (30)                   | NA                  | 53 (13)       | 103 (24)      |
| Graduate                              | NA                  | 73 (20)                    | 142 (31)                   | NA                  | 27 (7)        | 102 (24)      |
| Did not provide                       | NA                  | 1 (<1)                     | -                          | NA                  | 1 (<1)        | -             |
| Education for NCI-Ghana, N(%)         |                     |                            |                            |                     |               |               |
| None                                  | 75 (11)             | NA                         | NA                         | 39 (8)              | NA            | NA            |
| Primary                               | 47 (7)              | NA                         | NA                         | 16 (3)              | NA            | NA            |
| Middle / junior secondary             | 292 (45)            | NA                         | NA                         | 132 (27)            | NA            | NA            |
| Secondary/ senior secondary           | 125 (19)            | NA                         | NA                         | 99 (20)             | NA            | NA            |
| Higher                                | 86 (13)             | NA                         | NA                         | 190 (39)            | NA            | NA            |
| Did not provide                       | 29 (4)              | NA                         | NA                         | 13 (3)              | NA            | NA            |
| Annual household income, N(%)         |                     |                            |                            |                     |               |               |
| Less than \$10,000                    | NA                  | 18 (5)                     | 5 (1)                      | NA                  | 58 (15)       | 16 (4)        |
| \$10,000- \$29,999                    | NA                  | 63 (17)                    | 37 (8)                     | NA                  | 131 (33)      | 79 (19)       |
| \$30,000 - \$59,999                   | NA                  | 78 (21)                    | 111 (24)                   | NA                  | 94 (24)       | 89 (21)       |
| \$60,000-\$90,000                     | NA                  | 90 (24)                    | 105 (23)                   | NA                  | 41 (10)       | 86 (20)       |
| Greater than \$90,000                 | NA                  | 86 (23)                    | 168 (37)                   | NA                  | 32 (8)        | 130 (31)      |
| Don't know/Refused                    | NA                  | 39 (10)                    | 28 (6)                     | NA                  | 38 (10)       | 25 (6)        |
| <b>Baseline Health Factors</b>        |                     |                            |                            |                     |               |               |
| Smoking status <sup>f</sup> , N (%)   |                     |                            |                            |                     |               |               |
| Never                                 | 346 (53)            | 149 (40)                   | 191 (42)                   | 321 (66)            | 112 (28)      | 171 (40)      |
| Former                                | 186 (28)            | 153 (41)                   | 216 (48)                   | 150 (31)            | 152 (39)      | 187 (44)      |
| Current                               | 94 (14)             | 70 (19)                    | 42 (9)                     | 10 (2)              | 127 (32)      | 65 (15)       |
| Did not provide                       | 28 (4)              | 2 (<1)                     | 5 (1)                      | 8 (2)               | 3 (<1)        | 2 (<1)        |
| Diabetes, N(%)                        |                     |                            |                            |                     |               |               |
| No                                    | 602 (92)            | 260 (70)                   | 377 (83)                   | 397 (81)            | 282 (72)      | 360 (85)      |
| Yes                                   | 45 (7)              | 114 (30)                   | 77 (17)                    | 87 (18)             | 112 (28)      | 65 (15)       |
| Did not provide                       | 7 (1)               | -                          | -                          | 5 (1)               | -             | -             |
| Regular aspirin use, N(%)             |                     |                            |                            |                     |               |               |
| No                                    | 570 (87)            | 179 (48)                   | 173 (38)                   | 347 (71)            | 227 (58)      | 193 (45)      |
| Yes                                   | 66 (10)             | 195 (52)                   | 281 (62)                   | 78 (16)             | 167 (42)      | 232 (55)      |
| Did not provide                       | 18 (3)              | -                          | -                          | 64 (13)             | -             | -             |
| Gleason score, N (%)                  |                     |                            |                            |                     |               |               |
| Gleason score 2-6/ low grade          | NA                  | NA                         | NA                         | 149 (30)            | 159 (40)      | 187 (44)      |
| Gleason score 7/ intermediate grade   | NA                  | NA                         | NA                         | 175 (36)            | 167 (42)      | 165 (39)      |
| Gleason score 8-10/ high grade        | NA                  | NA                         | NA                         | 158 (32)            | 68 (17)       | 73 (17)       |
| Unavailable                           | NA                  | NA                         | NA                         | 7 (1)               | -             | -             |
| Stage <sup>g</sup> , N (%)            |                     |                            |                            |                     |               |               |
| I                                     | NA                  | NA                         | NA                         | NA                  | 62 (16)       | 97 (23)       |
| II                                    | NA                  | NA                         | NA                         | NA                  | 280 (71)      | 264 (62)      |
| III                                   | NA                  | NA                         | NA                         | NA                  | 23 (6)        | 41 (10)       |
| IV                                    | NA                  | NA                         | NA                         | NA                  | 29 (7)        | 23 (5)        |
| NCCN risk groups <sup>h</sup> , N (%) |                     |                            |                            |                     |               |               |
| Low                                   | NA                  | NA                         | NA                         | NA                  | 61 (15)       | 98 (23)       |
| intermediate                          | NA                  | NA                         | NA                         | NA                  | 217 (55)      | 211 (50)      |
| High/ Very high                       | NA                  | NA                         | NA                         | NA                  | 91 (23)       | 95 (22)       |
| Regional/ Metastatic                  | NA                  | NA                         | NA                         | NA                  | 25 (7)        | 21 (5)        |
| PSA <sup>i</sup>                      |                     |                            |                            |                     |               |               |
| Median (IQR) in ng/ml                 | 0.98 (1.46)         | 0.4 (0.6)                  | 0.4 (0.6)                  | 51.9 (101)          | 6.8 (7.6)     | 6.0 (4.9)     |

<sup>a</sup> AA: African-American; <sup>b</sup> EA: European American; <sup>c</sup> Age at study interview; <sup>d</sup> IQR: Interquartile range; <sup>e</sup> SD: Standard deviation

<sup>f</sup> Smoking status describes cigarette smoking; <sup>g</sup> Pathologically confirmed using American Joint Committee on Cancer (AJCC) 7th Edition

<sup>h</sup> Risk stratification based on the 2019 National Comprehensive Cancer Network (NCCN) guideline (see methods)

<sup>i</sup> PSA: Prostate specific antigen

Supplementary Table 2. Lower limit of detection for the 92 immuno-oncological proteins assayed

| Serum proteins | Lower Limit of Detection (LLOD)<br>in NPX | Missing Data freq. (proportion of samples<br>with protein level below LLOD) | Serum proteins | Lower Limit of Detection (LLOD)<br>in NPX | Missing Data freq. (proportion of<br>samples with protein level below LLOD) |
|----------------|-------------------------------------------|-----------------------------------------------------------------------------|----------------|-------------------------------------------|-----------------------------------------------------------------------------|
| IL33           | 1.59195                                   | 100%                                                                        | CXCL9          | 1.86220                                   | 0%                                                                          |
| IL-35          | 1.18313                                   | 100%                                                                        | ADA            | 0.21076                                   | 0%                                                                          |
| IL-21          | 1.72309                                   | 99%                                                                         | CXCL1          | 4.26373                                   | 0%                                                                          |
| IL2            | 1.68844                                   | 99%                                                                         | MCP-2          | 2.38761                                   | 0%                                                                          |
| IFN-beta       | 1.84622                                   | 95%                                                                         | HO-1           | 5.73997                                   | 0%                                                                          |
| IL13           | 1.56681                                   | 94%                                                                         | CX3CL1         | 0.63004                                   | 0%                                                                          |
| IL-1 alpha     | -0.03527                                  | 92%                                                                         | CD70           | 1.10604                                   | 0%                                                                          |
| CXCL12         | 2.22920                                   | 87%                                                                         | CCL23          | 2.99034                                   | 0%                                                                          |
| IFN-gamma      | 1.55567                                   | 87%                                                                         | CCL3           | 2.05152                                   | 0%                                                                          |
| TNF            | 2.15958                                   | 85%                                                                         | NCR1           | 0.66578                                   | 0%                                                                          |
| ARG1           | 5.27490                                   | 76%                                                                         | CCL17          | 2.84146                                   | 0%                                                                          |
| IL4            | 0.54505                                   | 75%                                                                         | ICOSLG         | 1.66922                                   | 0%                                                                          |
| IL5            | 2.01127                                   | 62%                                                                         | CCL20          | 2.39470                                   | 0%                                                                          |
| CD28           | 2.49576                                   | 58%                                                                         | IL8            | 2.99315                                   | 0%                                                                          |
| FGF2           | 1.24047                                   | 43%                                                                         | TNFRSF9        | 1.21451                                   | 0%                                                                          |
| NOS3           | 1.05396                                   | 37%                                                                         | TIE2           | 2.64389                                   | 0%                                                                          |
| ADGRG1         | 1.45257                                   | 16%                                                                         | CD244          | 1.45933                                   | 0%                                                                          |
| MIC-A/B        | 1.23883                                   | 9%                                                                          | PGF            | 2.42442                                   | 0%                                                                          |
| CD4            | -0.13759                                  | 5%                                                                          | MCP-1          | 3.78349                                   | 0%                                                                          |
| IL10           | 2.30912                                   | 5%                                                                          | TRAIL          | 1.76455                                   | 0%                                                                          |
| CD8A           | 2.55944                                   | 4%                                                                          | CAIX           | 0.77464                                   | 0%                                                                          |
| CCL19          | 2.95390                                   | 4%                                                                          | Gal-9          | 2.49023                                   | 0%                                                                          |
| CXCL10         | 1.42680                                   | 3%                                                                          | VEGFR-2        | 0.95838                                   | 0%                                                                          |
| PTN            | 0.57332                                   | 3%                                                                          | CD40           | 4.25081                                   | 0%                                                                          |
| IL12RB1        | 1.66460                                   | 2%                                                                          | IL18           | 3.18339                                   | 0%                                                                          |
| VEGFC          | 0.05409                                   | 2%                                                                          | TNFSF14        | 2.16990                                   | 0%                                                                          |
| MCP-3          | 1.37635                                   | 2%                                                                          | TWEAK          | 2.51722                                   | 0%                                                                          |
| CXCL5          | 6.60140                                   | 2%                                                                          | PDGF subunit B | 4.82460                                   | 0%                                                                          |
| CXCL11         | 2.22295                                   | 1%                                                                          | PDCD1          | 1.80311                                   | 0%                                                                          |
| PD-L2          | 1.10516                                   | 1%                                                                          | FASLG          | 1.83999                                   | 0%                                                                          |
| LAP TGF-beta-1 | 0.97475                                   | 1%                                                                          | Gal-1          | 1.76849                                   | 0%                                                                          |
| GZMH           | 2.05211                                   | 0%                                                                          | PD-L1          | 2.05346                                   | 0%                                                                          |
| EGF            | 4.36494                                   | 0%                                                                          | CD27           | 2.43845                                   | 0%                                                                          |
| CRTAM          | 1.07615                                   | 0%                                                                          | HGF            | 2.23412                                   | 0%                                                                          |
| MCP-4          | 3.14076                                   | 0%                                                                          | GZMA           | 0.65531                                   | 0%                                                                          |
| CCL4           | 3.15472                                   | 0%                                                                          | TNFRSF12A      | 1.92242                                   | 0%                                                                          |
| DCN            | 1.24817                                   | 0%                                                                          | CD5            | 1.08175                                   | 0%                                                                          |
| GZMB           | 1.33242                                   | 0%                                                                          | MMP7           | 5.36396                                   | 0%                                                                          |
| CD40-L         | 2.42129                                   | 0%                                                                          | TNFRSF21       | 2.48109                                   | 0%                                                                          |
| IL7            | 1.73351                                   | 0%                                                                          | ANGPT2         | 1.12478                                   | 0%                                                                          |
| TNFRSF4        | 2.60002                                   | 0%                                                                          | LAMP3          | 2.20090                                   | 0%                                                                          |
| CASP-8         | 1.52429                                   | 0%                                                                          | MMP12          | 0.69984                                   | 0%                                                                          |
| CXCL13         | 2.32015                                   | 0%                                                                          | VEGFA          | 2.15947                                   | 0%                                                                          |
| IL12           | 1.44479                                   | 0%                                                                          | KLRD1          | 1.67210                                   | 0%                                                                          |
| ANG-1          | 3.51630                                   | 0%                                                                          | CD83           | 1.33464                                   | 0%                                                                          |
| IL6            | 2.02073                                   | 0%                                                                          | CSF-1          | 1.43577                                   | 0%                                                                          |



**Supplementary Table 3.** List of 82 immuno-oncological proteins detected in more than 20% of the serum samples

| Protein symbol | Protein name                                                 | Uniprot ID | Protein symbol | Protein name                                          | Uniprot ID    |
|----------------|--------------------------------------------------------------|------------|----------------|-------------------------------------------------------|---------------|
| IL8            | Interleukin-8                                                | P10145     | Gal-1          | Galectin-1                                            | P09382        |
| TNFRSF9        | Tumor necrosis factor receptor superfamily member 9          | Q07011     | PD-L1          | Programmed cell death 1 ligand 1                      | Q9NZQ7        |
| TIE2           | Angiopoietin-1 receptor                                      | Q02763     | CD27           | CD27 antigen                                          | P26842        |
| MCP-3          | Monocyte chemotactic protein 3                               | P80098     | CXCL5          | C-X-C motif chemokine 5                               | P42830        |
| CD40-L         | CD40 ligand                                                  | P29965     | IL5            | Interleukin-5                                         | P05113        |
| CD244          | Natural killer cell receptor 2B4                             | Q9BZW8     | HGF            | Hepatocyte growth factor                              | P14210        |
| EGF            | Pro-epidermal growth factor                                  | P01133     | GZMA           | Granzyme A                                            | P12544        |
| ANG-1          | Angiopoietin-1                                               | Q15389     | HO-1           | Heme oxygenase 1                                      | P09601        |
| IL7            | Interleukin-7                                                | P13232     | CX3CL1         | Fractalkine                                           | P78423        |
| PGF            | Placenta growth factor                                       | P49763     | CXCL10         | C-X-C motif chemokine 10                              | P02778        |
| IL6            | Interleukin-6                                                | P05231     | CD70           | CD70 antigen                                          | P32970        |
| ADGRG1         | Adhesion G-protein coupled receptor G1                       | Q9Y653     | IL10           | Interleukin-10                                        | P22301        |
| MCP-1          | Monocyte chemotactic protein 1                               | P13500     | TNFRSF12A      | Tumor necrosis factor receptor superfamily member 12A | Q9NP84        |
| CRTAM          | Cytotoxic and regulatory T-cell molecule (CRTAM)             | O95727     | CCL23          | C-C motif chemokine 23                                | P55773        |
| CXCL11         | C-X-C motif chemokine 11                                     | O14625     | CD5            | T-cell surface glycoprotein CD5                       | P06127        |
| MCP-4          | Monocyte chemotactic protein 4                               | Q99616     | CCL3           | C-C motif chemokine 3                                 | P10147        |
| TRAIL          | TNF-related apoptosis-inducing ligand                        | P50591     | MMP7           | Matrix metalloproteinase-7                            | P09237        |
| FGF2           | Fibroblast growth factor 2                                   | P09038     | NCR1           | Natural cytotoxicity triggering receptor 1            | O76036        |
| CXCL9          | C-X-C motif chemokine 9                                      | Q07325     | DCN            | Decorin                                               | P07585        |
| CD8A           | T-cell surface glycoprotein CD8 alpha chain                  | P01732     | TNFRSF21       | Tumor necrosis factor receptor superfamily member 21  | O75509        |
| CAIX           | Carbonic anhydrase IX                                        | Q16790     | TNFRSF4        | Tumor necrosis factor receptor superfamily member 4   | P43489        |
| ADA            | Adenosine Deaminase                                          | P00813     | MIC-A/B        | MHC class I polypeptide-related sequence A/B          | Q29983,Q29980 |
| CD4            | T-cell surface glycoprotein CD4                              | P01730     | CCL17          | C-C motif chemokine 17                                | Q92583        |
| NOS3           | Nitric oxide synthase, endothelial                           | P29474     | ANGPT2         | Angiopoietin-2                                        | O15123        |
| Gal-9          | Galectin-9                                                   | O00182     | PTN            | Pleiotrophin                                          | P21246        |
| VEGFR-2        | Vascular endothelial growth factor receptor 2                | P35968     | LAMP3          | Lysosome-associated membrane glycoprotein 3           | Q9UQV4        |
| CD40           | CD40L receptor                                               | P25942     | CASP-8         | Caspase-8                                             | Q14790        |
| IL18           | Interleukin-18                                               | Q14116     | ICOSLG         | ICOS ligand                                           | O75144        |
| GZMH           | Granzyme H                                                   | P20718     | MMP12          | Matrix metalloproteinase-12                           | P39900        |
| VEGFC          | Vascular endothelial growth factor C                         | P49767     | CXCL13         | C-X-C motif chemokine 13                              | O43927        |
| LAP TGF-beta-1 | Latency-associated peptide transforming growth factor beta-1 | P01137     | PD-L2          | Programmed cell death 1 ligand 2                      | Q9BQ51        |
| CXCL1          | C-X-C motif chemokine 1                                      | P09341     | VEGFA          | Vascular endothelial growth factor A                  | P15692        |
| TNFSF14        | Tumor necrosis factor ligand superfamily member 14           | O43557     | IL4            | Interleukin-4                                         | P05112        |
| TWEAK          | Tumor necrosis factor (Ligand) superfamily, member 12        | O43508     | IL12RB1        | Interleukin-12 receptor subunit beta-1                | P42701        |
| PDGF subunit B | Platelet-derived growth factor subunit B                     | P01127     | CCL20          | C-C motif chemokine 20                                | P78556        |
| PDCD1          | Programmed cell death protein 1                              | Q15116     | KLRD1          | Natural killer cells antigen CD94                     | Q13241        |
| FASLG          | Fas antigen ligand                                           | P48023     | GZMB           | Granzyme B                                            | P10144        |
| CD28           | T-cell-specific surface glycoprotein CD28                    | P10747     | CD83           | CD83 antigen                                          | Q01151        |
| CCL19          | C-C motif chemokine 19                                       | Q99731     | IL12           | Interleukin-12                                        | P29459,P29460 |
| MCP-2          | Monocyte chemotactic protein 2                               | P80075     | CSF-1          | Macrophage colony-stimulating factor 1                | P09603        |
| CCL4           | C-C motif chemokine 4                                        | P13236     | ARG1           | Arginase-1                                            | P05089-1      |

**Supplementary Table 4.** Top 10 Pearson pairwise correlations in men with and without prostate cancer

| Ghanaian men without prostate cancer |                 |                 | AA men without prostate cancer |                 |                 | EA men without prostate cancer |                 |                 |
|--------------------------------------|-----------------|-----------------|--------------------------------|-----------------|-----------------|--------------------------------|-----------------|-----------------|
| Serum protein 1                      | Serum Protein 2 | Correlation (r) | Serum protein 1                | Serum Protein 2 | Correlation (r) | Serum protein 1                | Serum Protein 2 | Correlation (r) |
| PDL2                                 | ICOSLG          | 0.84            | IL8                            | MCP3            | 0.89            | IL8                            | MCP3            | 0.89            |
| ICOSLG                               | HO1             | -0.79           | CD83                           | TNFRSF9         | 0.85            | CCL3                           | CCL4            | 0.82            |
| GZMB                                 | GZMH            | 0.76            | TNFRSF4                        | TNFRSF9         | 0.85            | EGF                            | CD40L           | 0.80            |
| HO1                                  | PDL2            | -0.73           | EGF                            | CD40L           | 0.83            | IL8                            | CASP8           | 0.80            |
| KLRD1                                | CD244           | 0.71            | IL8                            | CASP8           | 0.82            | TNFRSF4                        | TNFRSF9         | 0.80            |
| CCL3                                 | CCL4            | 0.71            | CD83                           | TNFRSF4         | 0.80            | GZMB                           | GZMH            | 0.78            |
| EGF                                  | CD40L           | 0.71            | PGF                            | TNFRSF9         | 0.80            | PGF                            | CD27            | 0.78            |
| PDL2                                 | TIE2            | 0.70            | PGF                            | TNFRSF21        | 0.80            | CD83                           | TNFRSF9         | 0.76            |
| CXCL10                               | CXCL9           | 0.70            | PGF                            | TNFRSF4         | 0.79            | CD83                           | TNFRSF9         | 0.76            |
| IL8                                  | CASP8           | 0.69            | PGF                            | NCR1            | 0.79            | MCP3                           | CASP8           | 0.75            |

  

| Ghanaian men with prostate cancer |                 |                 | AA men with prostate cancer |                 |                 | EA men with prostate cancer |                 |                 |
|-----------------------------------|-----------------|-----------------|-----------------------------|-----------------|-----------------|-----------------------------|-----------------|-----------------|
| Serum protein 1                   | Serum Protein 2 | Correlation (r) | Serum protein 1             | Serum Protein 2 | Correlation (r) | Serum protein 1             | Serum Protein 2 | Correlation (r) |
| CD8A                              | HO1             | 0.86            | MCP3                        | IL8             | 0.89            | MCP3                        | IL8             | 0.84            |
| CXCL10                            | TWEAK           | 0.86            | EGF                         | CD40L           | 0.87            | TNFRSF4                     | TNFRSF9         | 0.80            |
| TNFRSF9                           | TNFRSF4         | 0.85            | TNFRSF4                     | TNFRSF9         | 0.86            | EGF                         | CD40L           | 0.77            |
| CCL3                              | CCL4            | 0.85            | TNFRSF9                     | PGF             | 0.84            | CCL3                        | CCL4            | 0.76            |
| TNFRSF9                           | PGF             | 0.85            | CD83                        | TNFRSF9         | 0.83            | PGF                         | TNFRSF12A       | 0.75            |
| CXCL10                            | CXCL11          | 0.85            | CD83                        | PGF             | 0.82            | TNFRSF21                    | PGF             | 0.75            |
| CD8A                              | TIE2            | -0.84           | PGF                         | TNFRSF12A       | 0.82            | TNFRSF14                    | EGF             | 0.75            |
| IL6                               | CCL4            | 0.84            | CD83                        | TNFRSF4         | 0.82            | PGF                         | TNFRSF9         | 0.74            |
| TNFRSF4                           | PGF             | 0.83            | TNFRSF4                     | PGF             | 0.80            | PGF                         | TNFRSF4         | 0.74            |
| TNFRSF12A                         | PGF             | 0.82            | CX3CL1                      | PGF             | 0.80            | MCP3                        | CASP8           | 0.75            |

**Supplementary Table 5.** The association of blood CRP with clinical/sociodemographic variables estimated using multiple linear regression

|                                                                             | Coefficient [95% CI]    | <i>P</i> -value | <i>q</i> -value |
|-----------------------------------------------------------------------------|-------------------------|-----------------|-----------------|
| BMI (kg/m <sup>2</sup> )                                                    | 59.56 [-29.6, 148.7]    | 0.19            | 0.57            |
| age                                                                         | 9.75 [-58.53, 78.02]    | 0.78            | 0.96            |
| education (high school or less, some college, college, professional school) | 10.9 [-448.8, 427.0]    | 0.96            | 0.96            |
| smoke (never, former, vs. current)                                          | 891.9 [220.6, 1563.3]   | 0.01            | 0.06            |
| diabetes (no vs. yes)                                                       | -95.5 [-1391.8, 1200.8] | 0.88            | 0.96            |
| PSA (ng/ml)                                                                 | -59.3[-507.5, 389.0]    | 0.79            | 0.96            |



**Supplementary Table 6.** The fraction of variance in each of the serum proteins explained by degree of West African ancestry

| Serum Proteins | Number of observations | Root Mean Square |          | Variance     |         | F-statistics | p-value | †q-value |
|----------------|------------------------|------------------|----------|--------------|---------|--------------|---------|----------|
|                |                        | Error (RMSE)     | fraction | F-statistics | p-value |              |         |          |
| CXCL5          | 795                    | 0.699            | 0.498    | 786.48       | <0.0001 | <0.0001      |         |          |
| CXCL1          | 795                    | 0.632            | 0.408    | 545.60       | <0.0001 | <0.0001      |         |          |
| MCP2           | 795                    | 0.648            | 0.152    | 141.88       | <0.0001 | <0.0001      |         |          |
| MCP1           | 795                    | 0.666            | 0.147    | 136.34       | <0.0001 | <0.0001      |         |          |
| CXCL11         | 795                    | 1.071            | 0.128    | 116.81       | <0.0001 | <0.0001      |         |          |
| CCL23          | 795                    | 0.521            | 0.105    | 92.68        | <0.0001 | <0.0001      |         |          |
| PTN            | 795                    | 1.153            | 0.100    | 87.66        | <0.0001 | <0.0001      |         |          |
| TWEAK          | 795                    | 0.332            | 0.090    | 78.73        | <0.0001 | <0.0001      |         |          |
| NCR1           | 795                    | 0.556            | 0.074    | 63.32        | <0.0001 | <0.0001      |         |          |
| CCL17          | 795                    | 0.781            | 0.049    | 40.57        | <0.0001 | <0.0001      |         |          |
| IL18           | 795                    | 0.610            | 0.048    | 40.11        | <0.0001 | <0.0001      |         |          |
| CD8A           | 795                    | 0.790            | 0.047    | 38.81        | <0.0001 | <0.0001      |         |          |
| IL12           | 795                    | 0.792            | 0.042    | 34.53        | <0.0001 | <0.0001      |         |          |
| CXCL9          | 795                    | 0.910            | 0.041    | 34.04        | <0.0001 | <0.0001      |         |          |
| TNFRSF4        | 795                    | 0.509            | 0.041    | 33.50        | <0.0001 | <0.0001      |         |          |
| MCP4           | 795                    | 0.697            | 0.039    | 32.23        | <0.0001 | <0.0001      |         |          |
| MMP7           | 795                    | 0.308            | 0.030    | 24.28        | <0.0001 | <0.0001      |         |          |
| CCL3           | 795                    | 1.464            | 0.029    | 23.38        | <0.0001 | <0.0001      |         |          |
| TNFRSF21       | 795                    | 0.270            | 0.024    | 19.66        | <0.0001 | <0.0001      |         |          |
| TNFRSF9        | 795                    | 0.561            | 0.024    | 19.44        | <0.0001 | <0.0001      |         |          |
| HO1            | 795                    | 0.395            | 0.023    | 18.96        | <0.0001 | 0.0001       |         |          |
| PDL2           | 795                    | 0.405            | 0.022    | 17.61        | <0.0001 | 0.0001       |         |          |
| CD70           | 795                    | 0.460            | 0.020    | 16.13        | 0.0001  | 0.0002       |         |          |
| CCL20          | 795                    | 1.255            | 0.020    | 16.02        | 0.0001  | 0.0002       |         |          |
| TNFSF14        | 795                    | 0.904            | 0.019    | 15.07        | 0.0001  | 0.0004       |         |          |
| IL7            | 795                    | 0.592            | 0.018    | 14.74        | 0.0001  | 0.0004       |         |          |
| ARG1           | 795                    | 0.372            | 0.017    | 14.04        | 0.0002  | 0.0006       |         |          |
| CCL19          | 795                    | 0.892            | 0.016    | 13.15        | 0.0003  | 0.0009       |         |          |
| LAMP3          | 795                    | 0.753            | 0.012    | 9.22         | 0.0025  | 0.0070       |         |          |
| TRAIL          | 795                    | 0.326            | 0.011    | 8.96         | 0.0028  | 0.0078       |         |          |
| HGF            | 795                    | 0.480            | 0.011    | 8.62         | 0.0034  | 0.0091       |         |          |
| FGF2           | 795                    | 0.624            | 0.010    | 8.31         | 0.004   | 0.0104       |         |          |
| CASP8          | 795                    | 1.250            | 0.009    | 7.51         | 0.0063  | 0.0156       |         |          |
| GZMB           | 795                    | 0.966            | 0.008    | 6.59         | 0.0104  | 0.0251       |         |          |
| CCL4           | 795                    | 0.835            | 0.008    | 6.53         | 0.0108  | 0.0253       |         |          |
| ICOSLG         | 795                    | 0.286            | 0.008    | 6.19         | 0.0131  | 0.0290       |         |          |
| PGF            | 795                    | 0.415            | 0.008    | 6.19         | 0.0131  | 0.0290       |         |          |
| NOS3           | 795                    | 0.381            | 0.007    | 5.60         | 0.0182  | 0.0393       |         |          |
| MICAB          | 795                    | 1.682            | 0.007    | 5.52         | 0.0191  | 0.0401       |         |          |
| GZMH           | 795                    | 1.014            | 0.006    | 4.56         | 0.033   | 0.0677       |         |          |
| PDCD1          | 795                    | 0.637            | 0.006    | 4.52         | 0.0339  | 0.0677       |         |          |
| CD83           | 795                    | 0.432            | 0.005    | 4.30         | 0.0384  | 0.0732       |         |          |
| FASLG          | 795                    | 0.437            | 0.005    | 4.32         | 0.038   | 0.0732       |         |          |
| CRTAM          | 795                    | 0.599            | 0.005    | 4.03         | 0.0451  | 0.0822       |         |          |
| LAPTFbeta1     | 795                    | 0.336            | 0.005    | 4.06         | 0.0441  | 0.0822       |         |          |
| CSF1           | 795                    | 0.239            | 0.005    | 3.82         | 0.0509  | 0.0907       |         |          |
| CXCL10         | 795                    | 0.905            | 0.005    | 3.72         | 0.0542  | 0.0946       |         |          |
| Gal9           | 795                    | 0.402            | 0.004    | 3.41         | 0.0653  | 0.1116       |         |          |
| VEGFC          | 795                    | 0.469            | 0.004    | 3.29         | 0.0702  | 0.1174       |         |          |
| PDGFsubunitB   | 795                    | 0.127            | 0.004    | 3.12         | 0.0778  | 0.1275       |         |          |
| IL6            | 795                    | 1.181            | 0.004    | 2.91         | 0.0885  | 0.1423       |         |          |
| Gal1           | 795                    | 0.238            | 0.004    | 2.87         | 0.0905  | 0.1426       |         |          |
| ANG1           | 795                    | 0.292            | 0.003    | 2.21         | 0.1377  | 0.2130       |         |          |
| IL10           | 795                    | 0.550            | 0.002    | 1.80         | 0.1807  | 0.2694       |         |          |
| KLRD1          | 795                    | 0.615            | 0.002    | 1.81         | 0.1789  | 0.2694       |         |          |
| CD27           | 795                    | 0.466            | 0.002    | 1.75         | 0.1859  | 0.2722       |         |          |
| CX3CL1         | 795                    | 0.446            | 0.002    | 1.56         | 0.2128  | 0.3061       |         |          |
| IL8            | 795                    | 2.693            | 0.002    | 1.46         | 0.227   | 0.3210       |         |          |
| VEGFR2         | 795                    | 0.259            | 0.002    | 1.19         | 0.2754  | 0.3828       |         |          |
| CD5            | 795                    | 0.410            | 0.001    | 1.14         | 0.2858  | 0.3906       |         |          |
| CD40           | 795                    | 0.477            | 0.001    | 1.00         | 0.3187  | 0.4284       |         |          |
| CD28           | 795                    | 0.355            | 0.001    | 0.94         | 0.3323  | 0.4395       |         |          |
| TNFRSF12A      | 795                    | 0.479            | 0.001    | 0.77         | 0.3792  | 0.4935       |         |          |
| IL4            | 795                    | 0.938            | 0.001    | 0.72         | 0.3949  | 0.5059       |         |          |
| ADA            | 795                    | 0.594            | 0.001    | 0.61         | 0.4354  | 0.5275       |         |          |
| ANGPT2         | 795                    | 0.500            | 0.001    | 0.60         | 0.4385  | 0.5275       |         |          |
| CD40L          | 795                    | 0.844            | 0.001    | 0.63         | 0.4283  | 0.5275       |         |          |
| MCP3           | 795                    | 2.432            | 0.001    | 0.61         | 0.4359  | 0.5275       |         |          |
| TIE2           | 795                    | 0.267            | 0.001    | 0.59         | 0.4439  | 0.5275       |         |          |
| EGF            | 795                    | 1.008            | 0.001    | 0.55         | 0.4581  | 0.5367       |         |          |
| CD4            | 795                    | 0.372            | 0.001    | 0.38         | 0.5376  | 0.6111       |         |          |
| IL5            | 795                    | 1.320            | 0.001    | 0.37         | 0.5441  | 0.6111       |         |          |
| VEGFA          | 795                    | 0.515            | 0.001    | 0.37         | 0.5408  | 0.6111       |         |          |
| GZMA           | 795                    | 0.484            | 0.000    | 0.17         | 0.6839  | 0.7578       |         |          |
| CAIX           | 795                    | 0.651            | 0.000    | 0.13         | 0.7201  | 0.7873       |         |          |
| MMP12          | 795                    | 0.763            | 0.000    | 0.08         | 0.7808  | 0.8424       |         |          |
| ADGRG1         | 795                    | 1.053            | 0.000    | 0.05         | 0.8243  | 0.8779       |         |          |
| CD244          | 795                    | 0.376            | 0.000    | 0.03         | 0.8551  | 0.8990       |         |          |
| PDL1           | 795                    | 0.551            | 0.000    | 0.02         | 0.8862  | 0.9199       |         |          |
| CXCL13         | 795                    | 0.619            | 0.000    | 0.00         | 0.9678  | 0.9879       |         |          |
| DCN            | 795                    | 0.278            | 0.000    | 0.00         | 0.9841  | 0.9879       |         |          |
| IL12RB1        | 795                    | 0.433            | 0.000    | 0.00         | 0.9879  | 0.9879       |         |          |

Analysis of variance was performed for the levels of each of the 82 immune-oncological cytokines as a function of genetic estimation of West African admixture among men without prostate cancer from the NCI-Maryland study.

†The q-values represent FDR-adjusted p-values for multiple-testing of n=82.

**Supplementary Table 7.** The fraction of variance in each of the serum proteins explained by degree of West African ancestry after adjusting for differences in age, BMI, aspirin use, education, diabetes status, smoking, and income

| Serum Proteins | Number of observations | Root Mean Square Error (RMSE) | Variance fraction | F-statistics | p-value | q-value |
|----------------|------------------------|-------------------------------|-------------------|--------------|---------|---------|
| CXCL5          | 726                    | 0.703                         | 0.501             | 725.43       | <0.0001 | <0.0001 |
| CXCL1          | 726                    | 0.628                         | 0.406             | 494.33       | <0.0001 | <0.0001 |
| MCP1           | 726                    | 0.653                         | 0.165             | 142.58       | <0.0001 | <0.0001 |
| MCP2           | 726                    | 0.649                         | 0.146             | 123.35       | <0.0001 | <0.0001 |
| CXCL11         | 726                    | 1.056                         | 0.130             | 108.20       | <0.0001 | <0.0001 |
| PTN            | 726                    | 1.142                         | 0.111             | 90.36        | <0.0001 | <0.0001 |
| CCL23          | 726                    | 0.522                         | 0.108             | 87.17        | <0.0001 | <0.0001 |
| TWEAK          | 726                    | 0.331                         | 0.087             | 68.55        | <0.0001 | <0.0001 |
| NCR1           | 726                    | 0.556                         | 0.076             | 59.19        | <0.0001 | <0.0001 |
| IL18           | 726                    | 0.602                         | 0.056             | 43.19        | <0.0001 | <0.0001 |
| CCL17          | 726                    | 0.778                         | 0.054             | 40.90        | <0.0001 | <0.0001 |
| CD8A           | 726                    | 0.789                         | 0.050             | 38.29        | <0.0001 | <0.0001 |
| IL12           | 726                    | 0.776                         | 0.048             | 36.62        | <0.0001 | <0.0001 |
| TNFRSF4        | 726                    | 0.509                         | 0.048             | 36.41        | <0.0001 | <0.0001 |
| CXCL9          | 726                    | 0.886                         | 0.048             | 36.37        | <0.0001 | <0.0001 |
| MCP4           | 726                    | 0.700                         | 0.037             | 27.65        | <0.0001 | <0.0001 |
| MMP7           | 726                    | 0.307                         | 0.028             | 20.82        | <0.0001 | <0.0001 |
| TNFRSF9        | 726                    | 0.562                         | 0.026             | 19.31        | <0.0001 | 0.0001  |
| HO1            | 726                    | 0.396                         | 0.025             | 18.69        | <0.0001 | 0.0001  |
| TNFSF14        | 726                    | 0.908                         | 0.024             | 17.76        | <0.0001 | 0.0001  |
| TNFRSF21       | 726                    | 0.271                         | 0.024             | 17.64        | <0.0001 | 0.0001  |
| CCL3           | 726                    | 1.432                         | 0.022             | 16.07        | 0.0001  | 0.0002  |
| CD70           | 726                    | 0.457                         | 0.022             | 16.01        | 0.0001  | 0.0002  |
| PDL2           | 726                    | 0.408                         | 0.021             | 15.25        | 0.0001  | 0.0004  |
| ARG1           | 726                    | 0.375                         | 0.019             | 13.83        | 0.0002  | 0.0007  |
| HGF            | 726                    | 0.481                         | 0.016             | 11.69        | 0.0007  | 0.0021  |
| TRAIL          | 726                    | 0.325                         | 0.016             | 11.63        | 0.0007  | 0.0021  |
| IL7            | 726                    | 0.592                         | 0.015             | 11.11        | 0.0009  | 0.0026  |
| CCL19          | 726                    | 0.892                         | 0.014             | 9.89         | 0.0017  | 0.0049  |
| CCL20          | 726                    | 1.193                         | 0.013             | 9.80         | 0.0018  | 0.0050  |
| CASP8          | 726                    | 1.244                         | 0.013             | 9.58         | 0.002   | 0.0052  |
| LAMP3          | 726                    | 0.753                         | 0.013             | 9.59         | 0.002   | 0.0052  |
| FGF2           | 726                    | 0.630                         | 0.011             | 8.12         | 0.0045  | 0.0112  |
| ICOSLG         | 726                    | 0.287                         | 0.011             | 7.96         | 0.0049  | 0.0118  |
| GZMB           | 726                    | 0.967                         | 0.009             | 6.53         | 0.0108  | 0.0254  |
| CXCL10         | 726                    | 0.887                         | 0.008             | 5.88         | 0.0156  | 0.0355  |
| PGF            | 726                    | 0.417                         | 0.008             | 5.59         | 0.0183  | 0.0405  |
| NOS3           | 726                    | 0.372                         | 0.006             | 4.59         | 0.0325  | 0.0701  |
| CD83           | 726                    | 0.435                         | 0.006             | 4.36         | 0.0372  | 0.0783  |
| LAPTFbeta1     | 726                    | 0.339                         | 0.006             | 4.31         | 0.0382  | 0.0783  |
| GZMH           | 726                    | 1.021                         | 0.006             | 4.02         | 0.0454  | 0.0887  |
| PDCD1          | 726                    | 0.646                         | 0.006             | 4.03         | 0.0451  | 0.0887  |
| MICAB          | 726                    | 1.661                         | 0.005             | 3.68         | 0.0556  | 0.1039  |
| Gal9           | 726                    | 0.401                         | 0.005             | 3.67         | 0.0558  | 0.1039  |
| CSF1           | 726                    | 0.240                         | 0.005             | 3.56         | 0.0595  | 0.1085  |
| CRTAM          | 726                    | 0.604                         | 0.005             | 3.39         | 0.0661  | 0.1179  |
| VEGFC          | 726                    | 0.469                         | 0.004             | 3.07         | 0.0804  | 0.1402  |
| CCL4           | 726                    | 0.812                         | 0.004             | 2.94         | 0.0869  | 0.1484  |
| FASLG          | 726                    | 0.439                         | 0.004             | 2.90         | 0.0889  | 0.1488  |
| VEGFR2         | 726                    | 0.257                         | 0.003             | 2.36         | 0.1248  | 0.2047  |
| IL8            | 726                    | 2.665                         | 0.003             | 2.27         | 0.1325  | 0.2131  |
| Gal1           | 726                    | 0.240                         | 0.003             | 2.19         | 0.1394  | 0.2199  |
| CD40           | 726                    | 0.481                         | 0.002             | 1.55         | 0.2135  | 0.3303  |
| IL5            | 726                    | 1.278                         | 0.002             | 1.36         | 0.2436  | 0.3688  |
| CD5            | 726                    | 0.409                         | 0.002             | 1.30         | 0.2546  | 0.3728  |
| IL10           | 726                    | 0.541                         | 0.002             | 1.34         | 0.2473  | 0.3688  |
| CD28           | 726                    | 0.367                         | 0.002             | 1.25         | 0.2643  | 0.3745  |
| PDGFsubunitB   | 726                    | 0.127                         | 0.002             | 1.24         | 0.2649  | 0.3745  |
| ANG1           | 726                    | 0.296                         | 0.002             | 1.10         | 0.2949  | 0.4054  |
| CD27           | 726                    | 0.464                         | 0.002             | 1.09         | 0.2966  | 0.4054  |
| MCP3           | 726                    | 2.417                         | 0.002             | 1.06         | 0.3044  | 0.4092  |
| ADA            | 726                    | 0.576                         | 0.001             | 0.92         | 0.3386  | 0.4407  |
| CX3CL1         | 726                    | 0.442                         | 0.001             | 0.92         | 0.3381  | 0.4407  |
| IL4            | 726                    | 0.965                         | 0.001             | 0.87         | 0.3503  | 0.4489  |
| KLRD1          | 726                    | 0.613                         | 0.001             | 0.83         | 0.3616  | 0.4562  |
| CD40L          | 726                    | 0.861                         | 0.001             | 0.75         | 0.3873  | 0.4812  |
| IL6            | 726                    | 1.144                         | 0.001             | 0.69         | 0.4053  | 0.4961  |
| TIE2           | 726                    | 0.265                         | 0.001             | 0.55         | 0.4585  | 0.5528  |
| EGF            | 726                    | 1.029                         | 0.001             | 0.33         | 0.564   | 0.6607  |
| IL12RB1        | 726                    | 0.432                         | 0.001             | 0.34         | 0.5576  | 0.6607  |
| CAIX           | 726                    | 0.647                         | 0.000             | 0.30         | 0.5864  | 0.6624  |
| CD4            | 726                    | 0.369                         | 0.000             | 0.31         | 0.5773  | 0.6624  |
| VEGFA          | 726                    | 0.521                         | 0.000             | 0.29         | 0.5897  | 0.6624  |
| DCN            | 726                    | 0.278                         | 0.000             | 0.13         | 0.7209  | 0.7882  |
| TNFRSF12A      | 726                    | 0.483                         | 0.000             | 0.15         | 0.701   | 0.7768  |
| CXCL13         | 726                    | 0.609                         | 0.000             | 0.09         | 0.7663  | 0.8268  |
| GZMA           | 726                    | 0.481                         | 0.000             | 0.04         | 0.8445  | 0.8993  |
| ADGRG1         | 726                    | 1.042                         | 0.000             | 0.00         | 0.9783  | 0.9783  |
| ANGPT2         | 726                    | 0.497                         | 0.000             | 0.02         | 0.8948  | 0.9058  |
| CD244          | 726                    | 0.377                         | 0.000             | 0.02         | 0.8921  | 0.9058  |
| MMP12          | 726                    | 0.757                         | 0.000             | 0.02         | 0.8818  | 0.9058  |
| PDL1           | 726                    | 0.562                         | 0.000             | 0.02         | 0.8764  | 0.9058  |

Analysis of variance was performed for the levels of each of the 82 immune-oncological cytokines as a function of genetic estimation of West African admixture among men without prostate cancer from the NCI-Maryland study.

<sup>1</sup>The q-values represent FDR-adjusted p-values for multiple-testing of n=82.

**Supplementary Table 8.** Immune oncological markers that are significantly elevated in both Ghanaian and AA men compared to EA men

| markers | EA                           | AA                           | Ghanaian                     | median ratio |         | median ratio |               | median ratio |         |
|---------|------------------------------|------------------------------|------------------------------|--------------|---------|--------------|---------------|--------------|---------|
|         | median (IQR)<br>(linear NPX) | median (IQR)<br>(linear NPX) | median (IQR)<br>(linear NPX) | (AA/EA)      | p-value | q-value      | (Ghanaian/EA) | p-value      | q-value |
| CXCL5   | 6284.05 (4332.56-8943.36)    | 17648.06 (13969.29-19884.74) | 18950.86 (16678.05-21055.39) | 2.81         | <0.0001 | <0.0001      | 3.02          | <0.0001      | <0.0001 |
| CXCL1   | 1794.85 (1347.21-2317.20)    | 3838.60 (2781.05-5121.68)    | 4730.16 (3864.12-5615.48)    | 2.14         | <0.0001 | <0.0001      | 2.64          | <0.0001      | <0.0001 |
| CXCL11  | 199.81 (140.72-287.12)       | 390.17 (187.00-674.34)       | 686.85 (400.24-1293.64)      | 1.95         | <0.0001 | <0.0001      | 3.44          | <0.0001      | <0.0001 |
| MCP2    | 401.48 (306.12-535.24)       | 570.79 (447.25-721.71)       | 609.02 (479.80-788.77)       | 1.42         | <0.0001 | <0.0001      | 1.52          | <0.0001      | <0.0001 |
| CCL17   | 1144.06 (806.42-1613.84)     | 1515.00 (1077.18-2151.31)    | 1578.03 (1177.14-2094.19)    | 1.32         | <0.0001 | <0.0001      | 1.38          | <0.0001      | <0.0001 |
| MCP4    | 1076.23 (792.86-1444.83)     | 1358.71 (931.83-1825.48)     | 1384.04 (1025.71-1929.18)    | 1.26         | <0.0001 | <0.0001      | 1.29          | <0.0001      | <0.0001 |
| CD70    | 21.69 (17.71-27.17)          | 24.56 (20.03-29.46)          | 32.51 (27.01-38.49)          | 1.13         | <0.0001 | 0.0001       | 1.5           | <0.0001      | <0.0001 |
| PDL2    | 10.34 (8.69-12.02)           | 11.50 (9.41-13.74)           | 15.47 (12.02-28.00)          | 1.11         | 0.0120  | 0.0304       | 1.5           | <0.0001      | <0.0001 |
| MMP7    | 3836.16 (3309.16-4334.54)    | 4204.66 (3677.46-4856.59)    | 4470.14 (3889.38-5087.45)    | 1.10         | <0.0001 | <0.0001      | 1.17          | <0.0001      | <0.0001 |
| CCL19   | 1075.95 (855.70-1458.43)     | 1177.98 (854.58-1946.63)     | 1170.39 (825.52-1615.30)     | 1.09         | 0.0194  | 0.0449       | 1.09          | 0.0352       | 0.0419  |

Medians were compared using two-sided Wilcoxon rank sum tests.

†The q-values represent FDR-adjusted p-values for multiple-testing.



**Supplementary Table 9.** Immune oncological markers that are significantly downregulated in both Ghanaian and AA men compared to EA men

| markers  | EA<br>median (IQR)        | AA<br>median (IQR)        | Ghanaian<br>median (IQR)  | median ratio<br>(AA/EA) | p-value | †q-value  | median ratio<br>(Ghanaian/EA) | p-value | †q-value |
|----------|---------------------------|---------------------------|---------------------------|-------------------------|---------|-----------|-------------------------------|---------|----------|
| MCP1     | 5013.63 (4088.21-6276.75) | 3168.62 (2454.90-5211.40) | 2316.18 (1999.64-2779.57) | 0.63                    | <0.0001 | <0.0001   | 0.46                          | <0.0001 | <0.0001  |
| IL12     | 189.78 (136.00-251.02)    | 134.41 (100.24-187.47)    | 146.88 (112.96-198.63)    | 0.71                    | <0.0001 | <0.0001   | 0.77                          | <0.0001 | <0.0001  |
| CCL23    | 2303.56 (1869.12-2871.36) | 1735.11 (1397.11-2407.05) | 1803.47 (1408.06-2344.48) | 0.75                    | <0.0001 | <0.0001   | 0.78                          | <0.0001 | <0.0001  |
| CD8A     | 1172.34 (859.33-1746.96)  | 886.06 (674.28-1337.39)   | 938.37 (586.78-1367.73)   | 0.76                    | <0.0001 | <0.0001   | 0.80                          | <0.0001 | <0.0001  |
| NCR1     | 14.57 (12.02-18.01)       | 11.63 (9.37-14.23)        | 10.12 (8.27-12.53)        | 0.80                    | <0.0001 | <0.0001   | 0.69                          | <0.0001 | <0.0001  |
| TNFRSF4  | 26.63 (22.81-31.37)       | 21.85 (18.42-27.95)       | 21.90 (17.85-27.63)       | 0.82                    | <0.0001 | <0.0001   | 0.82                          | <0.0001 | <0.0001  |
| TNFSF14  | 140.12 (91.45-210.43)     | 117.88 (76.88-185.51)     | 116.26 (84.07-164.84)     | 0.84                    | 0.0003  | 0.0010397 | 0.83                          | 0.0001  | 0.0002   |
| TWEAK    | 1031.16 (868.16-1186.18)  | 872.11 (762.15-1009.09)   | 889.01 (761.36-1018.81)   | 0.85                    | <0.0001 | <0.0001   | 0.86                          | <0.0001 | <0.0001  |
| IL7      | 96.82 (74.47-127.65)      | 85.91 (66.26-109.86)      | 84.68 (65.48-103.35)      | 0.89                    | <0.0001 | 0.0002    | 0.87                          | <0.0001 | <0.0001  |
| HGF      | 684.74 (566.67-840.30)    | 632.71 (533.60-775.66)    | 612.32 (513.02-734.06)    | 0.92                    | 0.00162 | 0.0050    | 0.89                          | <0.0001 | <0.0001  |
| HO1      | 7742.15 (6288.28-8830.06) | 7200.42 (5827.13-8554.93) | 4844.86 (2283.44-6817.24) | 0.93                    | 0.0164  | 0.0390    | 0.63                          | <0.0001 | <0.0001  |
| TNFRSF21 | 548.59 (497.35-598.66)    | 511.27 (456.66-583.68)    | 489.92 (435.65-557.77)    | 0.93                    | <0.0001 | <0.0001   | 0.89                          | <0.0001 | <0.0001  |
| ANG1     | 2480.61 (2221.52-2734.09) | 2397.11 (2139.86-2647.99) | 2351.09 (2033.01-2626.74) | 0.97                    | 0.0154  | 0.0378    | 0.95                          | 0.0003  | 0.0004   |

Medians were compared using two-sided Wilcoxon rank sum tests.

†The q-values represent FDR-adjusted p-values for multiple-testing.

**Supplementary Table 10.** Serum proteins grouped by biological process

| <b>Apoptosis</b> | <b>Autophagy</b> | <b>Chemotaxis</b> | <b>Promote TI</b> | <b>Suppress TI</b> | <b>Vasculature</b> |
|------------------|------------------|-------------------|-------------------|--------------------|--------------------|
| Gal9             | ADA              | CCL17             | CX3CL1            | CXCL11             | CXCL11             |
| TNFRSF12A        | CAIX             | CCL19             | CXCL10            | CXCL13             | CXCL1              |
| TWEAK            | HO1              | CCL20             | CXCL11            | CD4                | CXCL5              |
| MMP7             |                  | CCL23             | CXCL13            | CD5                | IL8                |
| CD40L            |                  | CCL3              | CD40L             | IL18               | MCP4               |
| TRAIL            |                  | CCL4              | TRAIL             | IL6                | Gal9               |
| CASP8            |                  | CX3CL1            | CD244             | CCL17              | Gal1               |
| FASLG            |                  | CXCL1             | CD27              | CCL19              | MMP12              |
| GZMA             |                  | CXCL10            | CD28              | CCL20              | CXCL10             |
| GZMB             |                  | CXCL11            | CD4               | CXCL1              | CXCL9              |
| GZMH             |                  | CXCL13            | CD40              | CXCL5              | CCL23              |
| TNFRSF21         |                  | CXCL5             | CD5               | IL8                | MCP1               |
|                  |                  | IL8               | CD70              | MCP4               | CAIX               |
|                  |                  | MCP1              | CD83              | Gal9               | TNFRSF12A          |
|                  |                  | MCP2              | CD8A              | MMP7               | TWEAK              |
|                  |                  | MCP3              | CRTAM             | CSF1               | ADGRG1             |
|                  |                  | MCP4              | CXCL9             | Gal1               | ANG1               |
|                  |                  |                   | ICOSLG            | IL10               | ANGPT2             |
|                  |                  |                   | IL12RB1           | IL4                | DCN                |
|                  |                  |                   | IL18              | IL5                | EGF                |
|                  |                  |                   | IL6               | LAMP3              | FGF2               |
|                  |                  |                   | IL7               | LAPTGFbeta1        | HGF                |
|                  |                  |                   | KLRD1             | MICAB              | IL12               |
|                  |                  |                   | NCR1              | MMP12              | NOS3               |
|                  |                  |                   | TNFRSF4           | PDCD1              | PDGFsubunitB       |
|                  |                  |                   | TNFRSF9           | PDL1               | PGF                |
|                  |                  |                   | TNFSF14           | PDL2               | PTN                |
|                  |                  |                   |                   | ARG1               | TIE2               |
|                  |                  |                   |                   |                    | VEGFA              |
|                  |                  |                   |                   |                    | VEGFC              |
|                  |                  |                   |                   |                    | VEGFR2             |

**Supplementary Table 11.** Effect of biological processes scores on all-cause mortality of prostate cancer patients

| Biological Processes score           | Unadjusted Hazard Ratio (95%CI) | p-value      | q-value      | *Adjusted Hazard Ratio (95%CI) | *Adjusted Hazard Ratio (99%CI) | p-value      | <sup>†</sup> q-value |
|--------------------------------------|---------------------------------|--------------|--------------|--------------------------------|--------------------------------|--------------|----------------------|
| <b>Apoptosis score</b>               | 0.75 (0.35, 1.59)               | 0.449        | 0.659        | 0.94 (0.43, 2.06)              | 0.94 (0.34, 2.64)              | 0.881        | 0.969                |
| <b>Autophagy score</b>               | 1.12 (0.78, 1.61)               | 0.549        | 0.659        | 0.92 (0.62, 1.34)              | 0.92 (0.55, 1.52)              | 0.651        | 0.969                |
| <b>Chemotaxis score</b>              | 0.57 (0.25, 1.30)               | 0.180        | 0.539        | 0.46 (0.18, 1.17)              | 0.46 (0.13, 1.57)              | 0.102        | 0.306                |
| <b>Promote Tumor Immunity Score</b>  | 0.93 (0.49, 1.78)               | 0.829        | 0.829        | 0.95 (0.46, 1.94)              | 0.95 (0.37, 2.44)              | 0.883        | 0.969                |
| <b>Suppress Tumor Immunity Score</b> | <b>5.66 (2.07, 15.48)</b>       | <b>0.001</b> | <b>0.004</b> | <b>5.96 (1.87, 18.95)</b>      | <b>5.96 (1.30, 27.26)</b>      | <b>0.002</b> | <b>0.012</b>         |
| <b>Vasculature score</b>             | 1.46 (0.58, 3.69)               | 0.421        | 0.659        | 1.02 (0.38, 2.75)              | 1.02 (0.28, 3.76)              | 0.969        | 0.969                |

Two-sided multivariable Cox regression analyses were used to assess if the pathways were independently associated with survival.

\*Hazard ratios were adjusted for age, BMI, race/ethnicity, education level, income level, smoking status, diabetes status, aspirin use, treatment type, and NCCN risk score.

<sup>†</sup>The q-values represent FDR-adjusted p-values for multiple testing of n=6.

**Supplementary Table 12.** Effect of biological processes scores on all-cause mortality of population controls

| Biological Processes scores          | Unadjusted<br>Hazard Ratio<br>(95%CI) | p-value      | q-value | *Adjusted<br>Hazard Ratio<br>(95%CI) | *Adjusted<br>Hazard Ratio<br>(99%CI) | p-value | †q-value |
|--------------------------------------|---------------------------------------|--------------|---------|--------------------------------------|--------------------------------------|---------|----------|
| <b>Apoptosis score</b>               | <b>0.27 (0.10, 0.75)</b>              | <b>0.012</b> | 0.059   | 0.47 (0.16, 1.33)                    | 0.47 (0.12, 1.84)                    | 0.153   | 0.458    |
| <b>Autophagy score</b>               | 1.19 (0.76, 1.87)                     | 0.457        | 0.457   | 1.25 (0.79, 2.00)                    | 1.25 (0.68, 2.31)                    | 0.344   | 0.516    |
| <b>Chemotaxis score</b>              | 0.40 (0.15, 1.11)                     | 0.078        | 0.117   | 0.77 (0.24, 2.42)                    | 0.77 (0.17, 3.48)                    | 0.649   | 0.779    |
| <b>Promote Tumor Immunity Score</b>  | <b>2.84 (1.18, 6.81)</b>              | <b>0.020</b> | 0.059   | 2.04 (0.82, 5.07)                    | 2.04 (0.61, 6.75)                    | 0.127   | 0.458    |
| <b>Suppress Tumor Immunity Score</b> | 3.60 (0.90, 14.44)                    | 0.071        | 0.117   | 2.19 (0.48, 9.96)                    | 2.19 (0.30, 16.03)                   | 0.310   | 0.516    |
| <b>Vasculature score</b>             | 2.74 (0.70, 10.76)                    | 0.148        | 0.178   | 1.12 (0.25, 5.10)                    | 1.12 (0.15, 8.21)                    | 0.866   | 0.886    |

Two-sided multivariable Cox regression analyses were used to assess if the pathways were independently associated with survival.

\*The hazard ratio was adjusted for age, BMI, education level, smoking status, diabetes status, aspirin use, income level, and race/ethnicity.

†The q-values represent FDR-adjusted p-values for multiple testing of n=6.

**Supplementary Table 13.** Effect of biological processes scores on prostate cancer-specific mortality

| Biological Processes scores          | Unadjusted<br>Hazard Ratio<br>(95% CI) | p-value | q-value | *Adjusted<br>Hazard Ratio<br>(95% CI) | *Adjusted<br>Hazard Ratio<br>(99% CI) | p-value      | †q-value |
|--------------------------------------|----------------------------------------|---------|---------|---------------------------------------|---------------------------------------|--------------|----------|
| <b>Apoptosis score</b>               | 0.56 (0.13, 2.30)                      | 0.417   | 0.787   | 0.92 (0.23, 3.73)                     | 0.92 (0.15, 5.80)                     | 0.907        | 0.907    |
| <b>Autophagy score</b>               | 1.20 (0.60, 2.39)                      | 0.601   | 0.787   | 1.08 (0.52, 2.24)                     | 1.08(0.41, 2.81)                      | 0.837        | 0.907    |
| <b>Chemotaxis score</b>              | 1.38 (0.30, 6.42)                      | 0.683   | 0.787   | 0.47 (0.08, 2.74)                     | 0.47 (0.05, 4.77)                     | 0.398        | 0.907    |
| <b>Promote Tumor Immunity Score</b>  | 1.32 (0.39, 4.49)                      | 0.652   | 0.787   | 0.70 (0.18, 2.69)                     | 0.70 (0.12, 4.11)                     | 0.607        | 0.907    |
| <b>Suppress Tumor Immunity Score</b> | 3.69 (0.55, 24.82)                     | 0.179   | 0.787   | <b>11.94 (1.36, 105.21)</b>           | 11.94 (0.68, 208.46)                  | <b>0.026</b> | 0.156    |
| <b>Vasculature score</b>             | 0.79 (0.14, 4.41)                      | 0.787   | 0.787   | 0.50 (0.07, 3.70)                     | 0.50 (0.04, 6.96)                     | 0.493        | 0.907    |

Two-sided multivariable Cox regression analyses were used to assess if the pathways were independently associated with survival.

\*Hazard ratios were adjusted for age, BMI, race/ethnicity, education level, income level, smoking status, diabetes status, aspirin use, treatment type, and NCCN risk score.

†The q-values represent FDR-adjusted p-values for multiple testing of n=6.

**Supplementary Table 14.** Effect of biological processes scores on mortality from any cancer following a diagnosis with prostate cancer

| Biological Processes score           | Unadjusted<br>Hazard Ratio<br>(95% CI) | p-value      | q-value | *Adjusted<br>Hazard Ratio<br>(95% CI) | *Adjusted<br>Hazard Ratio<br>(99% CI) | p-value      | <sup>†</sup> q-value |
|--------------------------------------|----------------------------------------|--------------|---------|---------------------------------------|---------------------------------------|--------------|----------------------|
| <b>Apoptosis score</b>               | 0.61 (0.21, 1.78)                      | 0.365        | 0.849   | 0.83 (0.28, 2.47)                     | 0.83 (0.20, 3.48)                     | 0.733        | 0.957                |
| <b>Autophagy score</b>               | 1.22 (0.73, 2.04)                      | 0.437        | 0.849   | 1.01 (0.60, 1.72)                     | 1.01(0.51, 2.03)                      | 0.957        | 0.957                |
| <b>Chemotaxis score</b>              | 0.73 (0.23, 2.34)                      | 0.598        | 0.849   | 0.34 (0.09, 1.28)                     | 0.34 (0.06, 1.94)                     | 0.111        | 0.333                |
| <b>Promote Tumor Immunity Score</b>  | 0.83 (0.32, 2.15)                      | 0.708        | 0.849   | 0.66 (0.24, 1.85)                     | 0.66 (0.17, 2.56)                     | 0.428        | 0.856                |
| <b>Suppress Tumor Immunity Score</b> | <b>5.67 (1.38, 23.21)</b>              | <b>0.016</b> | 0.095   | <b>11.86 (2.35, 59.93)</b>            | <b>11.86 (1.41, 99.69)</b>            | <b>0.003</b> | <b>0.018</b>         |
| <b>Vasculature score</b>             | 1.14 (0.31, 4.20)                      | 0.849        | 0.849   | 0.87 (0.21, 3.67)                     | 0.87 (0.13, 5.77)                     | 0.852        | 0.957                |

Two-sided multivariable Cox regression analyses were used to assess if the pathways were independently associated with survival.

\*Hazard ratios were adjusted for age, BMI, race/ethnicity, education level, income level, smoking status, diabetes status, aspirin use, treatment type, and NCCN risk score.

<sup>†</sup>The q-values represent FDR-adjusted p-values for multiple-testing of n=6.
